# Supplementary material for: Enhancing energy recovery of wastewater treatment plants through hydrothermal liquefaction
Source: Royal Society of Chemistry journal article supplement (doi:10.1039/d2ew00752e), 2022-12-07
Supplement: d2ew00752e1.pdf [file d2ew00752e1.pdf]

Enhancing energy recovery of wastewater  
treatment plants through hydrothermal  
liquefaction

## List of contents

**Figure S1.** Diagram of the HTL products separation.

**Figure S2.** Thermogravimetric (TG) and Derivative Thermogravimetric (DTG) curves for the sewage sludge and digestate biocrudes.

**Table S1.** □Elemental analysis and ash content of biocrude, solids in aqueous product, and hydrochar generated from sewage sludge and digestate.

**Table S2.** Major compounds identified in the biocrudes generated from the HTL of sewage sludge and digestate.

**Table S3.** Major compounds identified in the AP generated from the HTL of sewage sludge and digestate.

**Table S4.** Solids reduction and ash concentration in the HTL of SS and digestate

**Table S5.** Previous studies on the HTL of sewage sludge and digestate

**Table S6.** Parameters used in the Monte Carlo simulations

**Table S7.** Main results of the Monte Carlo Simulations (N = 100,000)

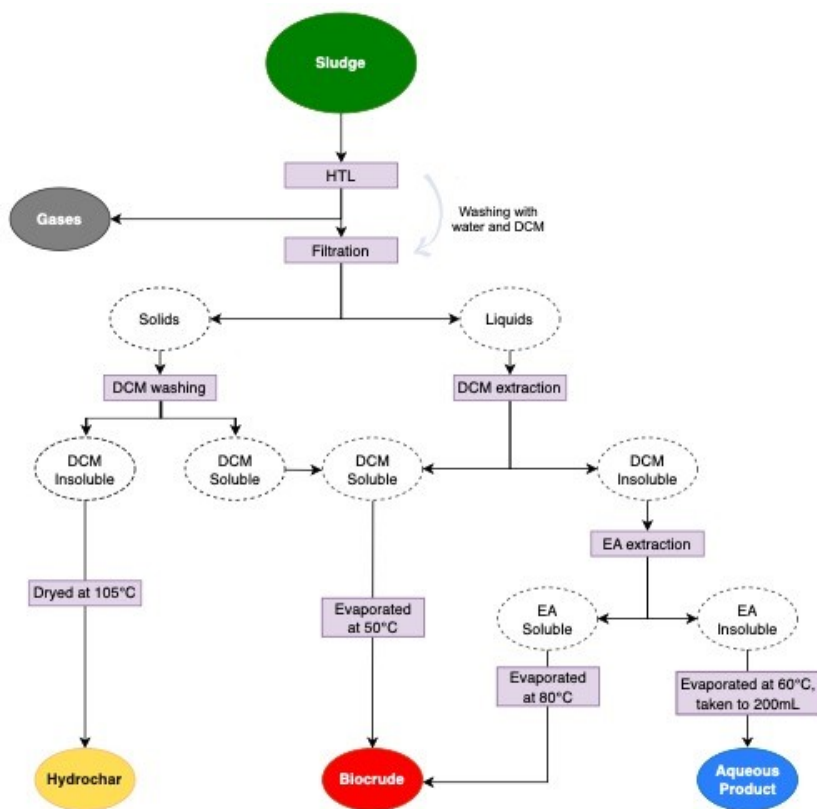

**Figure S1.** Diagram of the HTL products separation.

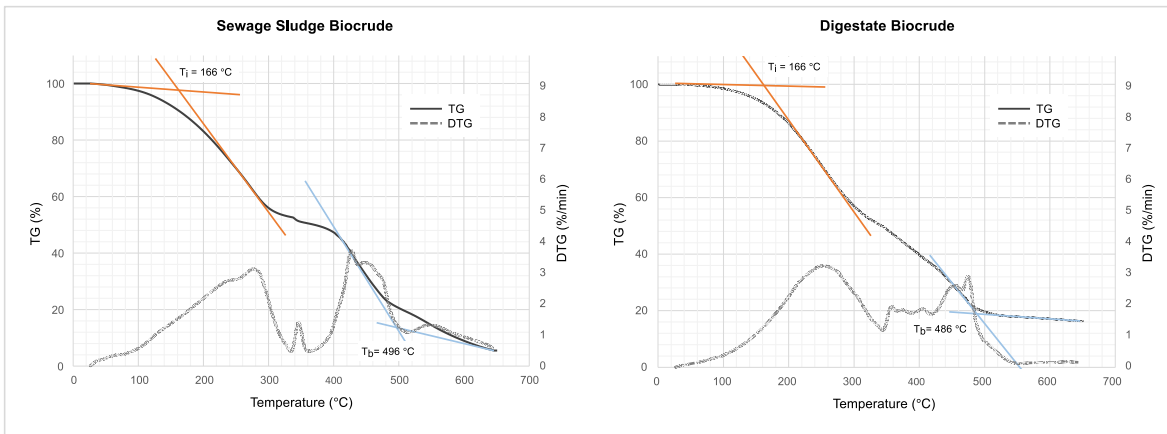

**Figure S2.** Thermogravimetric (TG) and Derivative Thermogravimetric (DTG) curves for sewage sludge and digestate biocrudes.  $T_i$  = ignition temperature;  $T_b$  = burnout temperature.

**Table S1.** Elemental analysis and ash content of biocrude, solids in aqueous product, and hydrochar generated from SS and digestate. Values are in wt% of dry product and represent the mean of three separate experiments  $\pm$  standard deviation.

|                         | <b>C</b>       | <b>H</b>       | <b>N</b>       | <b>Ash</b>     | <b>O</b>       | <b>HHV</b>     |
|-------------------------|----------------|----------------|----------------|----------------|----------------|----------------|
| <b>SS</b>               | 35.4 $\pm$ 0.8 | 6.3 $\pm$ 0.2  | 6.3 $\pm$ 0.1  | 26.1 $\pm$ 1.8 | 25.9 $\pm$ 1.1 | 16.4 $\pm$ 0.7 |
| Biocrude                | 75.1 $\pm$ 0.3 | 9.9 $\pm$ 0.1  | 3.1 $\pm$ 0.1  | 0.04 $\pm$ 0.0 | 11.8 $\pm$ 0.3 | 37.5 $\pm$ 0.3 |
| Aqueous<br>product (db) | 10.1 $\pm$ 0.1 | 5.8 $\pm$ 0.2  | 15.9 $\pm$ 0.4 | 46.4 $\pm$ 4.7 | 21.8 $\pm$ 0.6 | 7.8 $\pm$ 0.4  |
| Hydrochar               | 26.7 $\pm$ 0.5 | 1.7 $\pm$ 0.1  | 1.2 $\pm$ 0.0  | 70.6 $\pm$ 4.5 | 0.1 $\pm$ 0.2  | 11.4 $\pm$ 0.3 |
| <b>Digestate</b>        | 30.3 $\pm$ 0.7 | 5.4 $\pm$ 0.0  | 4.8 $\pm$ 0.1  | 35.8 $\pm$ 0.6 | 23.7 $\pm$ 0.7 | 13.7 $\pm$ 0.3 |
| Biocrude                | 77.6 $\pm$ 0.1 | 10.6 $\pm$ 0.0 | 2.5 $\pm$ 0.1  | 3.1 $\pm$ 0.0  | 6.1 $\pm$ 0.0  | 40.3 $\pm$ 0.0 |
| Aqueous<br>product (db) | 14.1 $\pm$ 0.2 | 5.4 $\pm$ 0.1  | 12.3 $\pm$ 0.2 | 36.3 $\pm$ 3.9 | 31.8 $\pm$ 0.1 | 6.8 $\pm$ 0.1  |
| Hydrochar               | 11.2 $\pm$ 1.2 | 0.9 $\pm$ 0.0  | 0.5 $\pm$ 0.1  | 77.7 $\pm$ 2.6 | 8.1 $\pm$ 1.2  | 3.6 $\pm$ 0.6  |

**Table S2.** Major compounds identified\* in the biocrudes generated from the HTL of sewage sludge and digestate.

| Peak | RT, min | Compound                                | Sewage sludge (Area, %) | Digestate (Area, %) |
|------|---------|-----------------------------------------|-------------------------|---------------------|
| 1    | 6,453   | Butanoic acid, 3-methyl                 | 4.85                    |                     |
| 2    | 6,703   | Butanoic acid, 2-methyl                 | 2.54                    |                     |
| 3    | 9,533   | Pentanoic acid, 4-methyl                | 2.00                    |                     |
| 4    | 10,464  | Phenol                                  | 6.74                    | 1.64                |
| 5    | 12,198  | 2(3H)-Furanone, 5-butyldihydro-4-methyl | 1.96                    |                     |
| 6    | 13,527  | p-cresol                                | 8.20                    | 2.69                |
| 7    | 14,332  | Undecane                                | 1.37                    |                     |
| 8    | 14,742  | Phenylethyl Alcohol                     | 2.15                    |                     |
| 9    | 16,433  | Phenol, 4-ethyl                         | 4.68                    | 3.03                |
| 10   | 19,543  | N-2-Hydroxyethyl-succinimide            | 2.01                    |                     |
| 11   | 27,596  | Dodecanoic acid                         | 1.21                    | 1.64                |
| 12   | 13,91   | 2,5-Pyrrolidinedione, 1-methyl          | 2.06                    |                     |
| 13   | 21,495  | Hydrocinnamic acid                      | 1.40                    |                     |
| 14   | 30,859  | 1-Hexadecanol                           |                         | 1.47                |
| 15   | 31,66   | Benzene, (1-pentylheptyl)               |                         | 1.34                |
| 16   | 31,765  | Benzene, (1-butyloctyl)                 |                         | 1.10                |
| 17   | 32,067  | Benzene, (1-propylnonyl)                |                         | 1.37                |
| 18   | 33,89   | Benzene, (1-pentylloctyl)               |                         | 1.98                |
| 19   | 34,695  | 2-Nonadecanone                          | 1.01                    | 1.21                |
| 20   | 35,487  | Hexadecanenitrile                       | 1.50                    |                     |
| 21   | 35,988  | Hexadecanoic acid, methyl ester         | 1.02                    |                     |
| 22   | 35,113  | Heptadecanol-1                          | 3.03                    |                     |
| 23   | 41,073  | 9-Octadecenamide                        |                         | 2.16                |
| 24   | 46,685  | Eicosane                                | 1.61                    | 6.07                |
| 25   | 39,658  | 1-Eicosanol                             | 1.64                    | 1.36                |
| 26   | 41,051  | Tetradecanamide                         | 6.35                    |                     |
| 27   | 44,776  | Octadecanamide                          | 2.51                    |                     |
| 28   | 45,001  | Octacosane                              | 1.77                    |                     |
| 29   | 48,295  | Nonacosane                              | 2.16                    |                     |
| 30   | 49,858  | Tetratetracontane                       |                         | 1.54                |
| 31   | 50,476  | Cholest-14-ene                          | 1.97                    | 4.29                |
| 32   | 52,15   | Cholest-4-ene                           | 15.2                    | 16.07               |
| 33   | 52,344  | Cholesta-3,5-diene                      |                         | 1.24                |
| 34   | 54,219  | Androstan-17-one, 3-hydroxy             | 1.88                    |                     |
| 35   | 54,565  | 13,15-Octacosadiyne                     | 1.99                    |                     |
| 36   | 54,896  | Androst-2-en-17-.beta.-ol, 17-methyl    | 3.81                    | 11.11               |

|              |        |                        |              |              |
|--------------|--------|------------------------|--------------|--------------|
| 37           | 55,406 | Cholestan-3-ol         |              | 2.46         |
| 38           | 55,869 | Cholestane, 2,3-epoxy- | 2.38         | 13.12        |
| 39           | 56,474 | Cholestan-3-one        |              | 4.36         |
| 40           | 57,534 | Cholest-4-en-3-one     |              | 1.55         |
|              |        | Other compounds        | <b>8.12</b>  | <b>16.00</b> |
| <b>Total</b> |        |                        | <b>99.12</b> | <b>98.8</b>  |

---

\* Representing >1% of the GC-MS total ion chromatogram areas. Compounds with match factor scores, between observed and reference mass spectrum, greater than or equal to 75% were assigned as identified compounds.

**Table S3.** Major compounds identified\* in the APs generated from the HTL of sewage sludge and digestate.

| Peak | RT, min | Compound                                 | Sewage sludge<br>(Relative area, %) | Digestate<br>(Relative area, %) |
|------|---------|------------------------------------------|-------------------------------------|---------------------------------|
| 1    | 6,453   | 2-Methylpyridine                         | 0,1                                 |                                 |
| 2    | 6,703   | 2,6-Dimethylpyridine                     | 0,13                                |                                 |
| 3    | 9,533   | 2-Propanone, 1-hydroxy-                  | 0,09                                |                                 |
| 4    | 10,464  | Pyridine, 2,4,6-trimethyl-               |                                     | 0,93                            |
| 5    | 12,198  | Pyridine, 2,4-dimethyl-                  |                                     | 0,11                            |
| 6    | 13,527  | Acetic acid                              | 90,5                                | 17,95                           |
| 7    | 14,332  | Pyridine, 3-ethyl-2,6-dimethyl-          | 0,16                                |                                 |
| 8    | 14,742  | Propanoic acid                           | 0,93                                | 1,07                            |
| 9    | 16,433  | 2-Furancarboxaldehyde, 5-methyl-         |                                     | 0,3                             |
| 10   | 19,543  | Butanoic acid                            | 0,43                                | 1,15                            |
| 11   | 27,596  | Butanoic acid, 4-hydroxy-                |                                     | 0,86                            |
| 12   | 13,91   | Pentanoic acid                           |                                     | 0,5                             |
| 13   | 21,495  | 1-Methyl-2-pyrrolidinone                 |                                     | 1,73                            |
| 14   | 30,859  | 1-Ethyl-2-pyrrolidinone                  |                                     | 0,57                            |
| 15   | 31,66   | Oxime-, methoxy-phenyl-                  |                                     | 14,62                           |
| 16   | 31,765  | 1H-Imidazole, 1-methyl-2-nitro-          |                                     | 0,51                            |
| 17   | 32,067  | Piperidine, 1-methyl-                    |                                     | 0,28                            |
| 18   | 33,89   | Cinnamionitrile                          | 0,11                                |                                 |
| 19   | 34,695  | Ethanol, 2,2'-oxybis-                    |                                     | 1,69                            |
| 20   | 35,487  | 5-Methyl-2-pyrrolidinone                 |                                     | 0,4                             |
| 21   | 35,988  | 2-Pyrrolidinone                          | 0,78                                |                                 |
| 22   | 35,113  | 2-Piperidinone                           | 0,14                                | 8,24                            |
| 23   | 41,073  | 3-Aminopyridine                          |                                     | 1,36                            |
| 24   | 46,685  | Caprolactam                              |                                     | 1,29                            |
| 25   | 39,658  | 3,4-dimethyl-1H-pyrrole-2-carboxaldehyde |                                     | 1,57                            |
| 26   | 41,051  | 2-Ethyl-6-methylpyridin-3-ol             |                                     | 0,89                            |
| 27   | 44,776  | Phenol, 4-amino-                         |                                     | 1,88                            |



|              |        |                                         |              |              |
|--------------|--------|-----------------------------------------|--------------|--------------|
| 28           | 45,001 | 2(1H)-Pyridinone, 1,3-dimethyl-         | 0,29         |              |
| 29           | 48,295 | 2-Ethyl-3-Hydroxypyridine               |              | 0,91         |
| 30           | 49,858 | Glutarimide                             |              | 0,54         |
| 31           | 50,476 | Phthalic acid, ethyl 2-ethylbutyl ester |              | 0,48         |
| 32           | 52,15  | Phenol, o-amino-                        |              | 5,06         |
| 33           | 52,344 | 3-Pyridinol, 6-methyl-                  | 0,57         |              |
| 34           | 54,219 | 3-Pyridinol                             | 0,47         | 8,06         |
| 35           | 54,565 | Succinimide                             | 0,44         |              |
| 36           | 54,896 | 2(1H)-Pyridinone, 3-methyl-             |              | 0,45         |
| 37           | 55,406 | 4-Amino-2,3-dimethylbenzaldehyde        |              | 0,22         |
| 38           | 55,869 | N-(2-Phenylethyl)acetamide              |              | 1,34         |
| 39           | 56,474 | 2-(4-Hydroxyphenyl)ethanol              | 0,3          |              |
| <b>Total</b> |        |                                         | <b>95,44</b> | <b>74,96</b> |

\* Compounds with match factor scores, between observed and reference mass spectrum, greater than or equal to 75% were assigned as identified compounds.

**Table S4.** Solids reduction from the HTL of sewage sludge and digestate

| <b>Measurement</b>                       | <b>Sewage<br/>sludge</b> | <b>Anaerobic<br/>digestate</b> |
|------------------------------------------|--------------------------|--------------------------------|
| <b>Solids in initial sludge feed (g)</b> | 2.76±0.004               | 2.72±0.003                     |
| Ash in sludge feed (g)                   | 0.72±0.05                | 0.98±0.01                      |
| Hydrochar (HTL solids) (g)               | 0.93±0.10                | 1.19±0.04                      |
| Ash in hydrochar (g)                     | 0.66±0.07                | 0.92±0.03                      |
| Recovery of ash in hydrochar (%)         | 92%                      | 94%                            |
| Reduction of initial sludge solids (%)   | 66%                      | 56%                            |

**Table S5.** Previous studies on the HTL of sewage sludge and digestate

| Author     | Sludge characteristics |      |     |     |     |      |                | HTL operating parameters |                      |            | Biocrude characteristics |                   |      |      |     |     |      |                |                  |
|------------|------------------------|------|-----|-----|-----|------|----------------|--------------------------|----------------------|------------|--------------------------|-------------------|------|------|-----|-----|------|----------------|------------------|
|            | Sludge                 | C    | H   | N   | S   | O    | Ash<br>(%, db) | HHV <sup>a</sup>         | Process <sup>b</sup> | T and time | VS<br>(%, db)            | Yield<br>(%, daf) | C    | H    | N   | S   | O    | Ash<br>(%, db) | HHV <sup>a</sup> |
| 1          | SS                     | 47.4 | 9.3 | 8.2 |     | 35.1 | 25.8           | 23.0                     | Batch                | 350C 60'   | 11.5                     | 25.8              |      |      |     |     |      |                |                  |
| 2          | PS                     | 46.5 | 6.1 | 3.3 | 0.4 | 31.2 | 12.5           | 18.9                     | Continuous           | 350C       | 3.5                      | 24.5              | 58.2 | 6.5  | 2.4 | 0.5 | 5.9  | 28.4           | 27.9             |
| 3          | PS                     | 45.3 | 7.3 | 2.5 | 0.3 | 33.7 | 13.0           | 19.7                     | Continuous           | 350C       | 13.9                     | 31.8              | 72.8 | 8.9  | 3.1 |     | 12.7 | 2.0            | 35.0             |
| 4          | PS                     | 47.8 | 6.5 | 3.6 | 0.5 | 33.6 | 7.5            | 19.4                     | Continuous           | 350C 18'   | 11.0                     | 37.3              | 76.5 | 10.1 | 4.3 | 0.6 | 8.1  | 0.4            | 38.8             |
|            | WAS                    | 43.6 | 6.5 | 7.9 | 0.7 | 29.0 | 16.2           | 18.9                     | Continuous           | 350C 19'   | 8.1                      | 24.8              | 72.5 | 8.7  | 5.1 | 0.9 | 6.5  | 6.3            | 35.8             |
|            | AD                     | 38.7 | 5.7 | 4.5 | 1.6 | 27.9 | 28.1           | 16.2                     | Continuous           | 350C 30'   | 11.5                     | 34.4              | 78.5 | 9.5  | 4.5 | 1.2 | 6.2  | 0.2            | 39.0             |
| 5          | SS                     | 43.4 | 6.5 | 5.0 | 0.8 | 27.6 | 16.7           | 19.0                     | Batch                | 325C 30'   | 8.3                      | 37.0              |      |      |     |     |      |                | 39.0             |
| 6          | SS                     | 52.0 | 7.6 | 7.5 | 2.6 | 30.3 | 36.7           | 15.3                     | Batch                | 300C 40'   | 10.5                     | 40.0              | 66.0 | 8.5  | 6.3 | 1.3 | 17.9 |                | 31.2             |
| 7          | SS                     | 43.4 | 5.9 | 3.2 |     | 47.5 | 39.2           | 14.6                     | Batch                | 350C 20'   | 4.4                      | 39.5              | 72.5 | 9.4  | 7.0 |     | 11.1 |                | 36.0             |
| 8          | WAS                    | 46.4 | 7.6 | 7.4 |     | 38.6 | 23.2           | 19.7                     | Batch                | 350C 15'   | 16.4                     | 44.5              | 73.0 | 10.5 | 5.2 |     | 11.3 |                | 37.7             |
| 9          | SS                     | 46.5 | 7.0 | 2.1 | 0.8 | 33.3 | 10.3           | 19.8                     | Batch                | 400C 60'   | 13.5                     | 26.8              | 72.5 | 9.4  | 7.0 |     | 11.1 |                | 36.1             |
| 10         | PS+ WAS                | 42.6 | 7.0 | 6.8 | 1.9 | 19.8 | 21.8           | 21.1                     | Batch                | 300C 120   | 10.2                     | 36.9              | 75.8 | 10.0 | 4.5 | 2.4 | 7.3  |                | 38.8             |
| 11         | WAS                    | 33.8 | 5.1 | 5.8 | 3.2 | 16.5 | 35.5           | 15.8                     | Batch                | 350C 10'   | 6.5                      | 20.0              | 73.1 | 9.2  | 4.4 | 1.7 | 11.6 |                | 35.8             |
| 12         | WAS                    | 50.9 | 7.4 | 6.9 |     | 34.8 | 40.6           | 21.5                     | Batch                | 350C 30'   | 16.0                     | 40.2              | 73.7 | 10.1 | 5.7 |     | 10.5 |                | 37.4             |
| 13         | AD                     |      |     |     |     |      | 31.0           |                          | Batch                | 300C 30'   | 13.8                     | 9.4               | 66.6 | 9.2  | 4.3 | 1.0 | 18.9 |                | 32.3             |
| This study | WAS                    | 35.4 | 6.3 | 6.3 |     | 25.9 | 26.1           | 16.4                     | Batch                | 350C 30'   | 2.0                      | 26.4              | 75.1 | 9.9  | 3.1 |     | 11.8 | 0.0            | 37.5             |
|            | AD                     | 30.3 | 5.4 | 4.8 |     | 23.7 | 35.8           | 13.7                     | Batch                | 350C 30'   | 1.7                      | 15.8              | 77.6 | 10.6 | 2.5 |     | 6.1  | 3.1            | 40.3             |

SS: sewage sludge (the source is not known); PS: primary sludge; WAS: waste activated sludge; PS: primary sludge; AD: anaerobic digestate; HHV: higher heating value; T: temperature; COD: chemical oxygen demand.

<sup>a</sup> Recalculated with Eq. (5)

<sup>b</sup> Values presented in this table correspond to HTL processes without addition of catalyst. For continuous mode, the HTL products were gravimetrically separated. For batch mode, the HTL products were separated using solvents.

**Table S6.** Parameters used for the Monte Carlo simulations

| Parameter                                      | Name      | HTL-AD                                                                                     | AD-HTL-AD                                                                                   |
|------------------------------------------------|-----------|--------------------------------------------------------------------------------------------|---------------------------------------------------------------------------------------------|
| COD of SS (kg)                                 | COD_SS    | 130                                                                                        | 130                                                                                         |
| VS of SS (kg)                                  | VS_SS     | 100                                                                                        | 100                                                                                         |
| HHV of SS (MJ/kg) <sup>a</sup>                 | HHV_SS    | ~ Tri (14, 17, 23)                                                                         | ~ Tri (14, 17, 23)                                                                          |
| Biodegradability of SS (fraction) <sup>b</sup> | f_SS      | -                                                                                          | ~ Tri (0.3, 0.5, 0.7)                                                                       |
| Produced methane from AD of SS (L)             | CH4_SS    | -                                                                                          | COD_SS * f_SS * 350                                                                         |
| Recovered energy from AD of SS (fraction)      | ER_AD_SS  | -                                                                                          | (CH4_SS * 39.74/1000) / (HHV_SS * VS_SS)                                                    |
| COD of digestate (kg)                          | COD_D     | -                                                                                          | COD_SS * (1 - f_SS)                                                                         |
| VS of digestate (kg)                           | VS_D      | -                                                                                          | COD_D / 1.1                                                                                 |
| HHV of biocrude (MJ/kg) <sup>a</sup>           | HHV_oil   | ~ Tri (28, 37, 39)                                                                         | ~ Tri (32, 37, 40)                                                                          |
| Maximum yield of biocrude (fraction)           | Max_Yield | 0.9 * (HHV_SS) / (HHV_OIL)                                                                 | (0.9 - ER_AD_SS) * VS_SS * HHV_SS / (VS_D * HHV_OIL)                                        |
| Biocrude Yield (fraction) <sup>a</sup>         | Yield_oil | ~ Tri (a, c, b)<br>a = 0.2<br>b = min (0.44, Max_Yield)<br>c = min ((a+0.31+b)/3, (a+b)/2) | ~ Tri (a, c, b)<br>a = 0.09<br>b = min (0.34, Max_Yield)<br>c = min ((a+0.16+b)/3, (a+b)/2) |
| Recovered energy from biocrude (fraction)      | ER_oil    | (Yield_oil) * (HHV_oil) / (HHV_SS)                                                         | Yield_oil * VS_D * HHV_oil / (HHV_SS * VS_SS)                                               |
| COD of biocrude (kg) <sup>c</sup>              | COD_oil   | HHV_oil * Yield_oil / 13.9                                                                 | HHV_oil * Yield_oil / 13.9                                                                  |
| COD of AP (kg) <sup>d</sup>                    | COD_AP    | (COD_SS - COD_oil) * 0.5                                                                   | (COD_D - COD_oil) * 0.5                                                                     |
| Biodegradability of AP (fraction) <sup>e</sup> | f_AP      | ~ Tri (0.4, 0.6, 0.8)                                                                      | ~ Tri (0.3, 0.5, 0.7)                                                                       |
| Produced methane from AD of AP (L)             | CH4_AP    | COD_AP * f_AP * 350                                                                        | COD_AP * f_AP * 350                                                                         |
| Recovered energy from AD of AP (fraction)      | ER_AD_AP  | CH4_AP * (39.74/1000) / (HHV_SS * VS_SS)                                                   | CH4_AP * (39.74/1000) / (HHV_SS * VS_SS)                                                    |
| Total recovered energy (%)                     | ER        | (ER_oil + ER_AD_AP) * 100%                                                                 | (ER_AD_SS + ER_oil + ER_AD_AP) * 100%                                                       |

<sup>a</sup> Values based on Table S4

<sup>b</sup> Astals et al.<sup>14</sup>

<sup>c</sup> COD values are converted from a mass to energy basis assuming 13.9 MJ/kg COD as reported by Seiple et al.<sup>15</sup>

<sup>d</sup> From the residual COD, 50% is partitioned to the AP

<sup>e</sup> Posmanik et al.<sup>16</sup> and the present study

**Table S7.** Main results of the Monte Carlo Simulations (N = 100,000)

|              | <b>AD</b>                  |                            | <b>HTL-AD</b>     |                 | <b>AD-HTL-AD</b>           |                            |                   |                 |
|--------------|----------------------------|----------------------------|-------------------|-----------------|----------------------------|----------------------------|-------------------|-----------------|
|              | ER from<br>AD of SS<br>(%) | ER from<br>biocrude<br>(%) | ER from<br>AP (%) | Total<br>ER (%) | ER from<br>AD of SS<br>(%) | ER from<br>biocrude<br>(%) | ER from<br>AP (%) | Total ER<br>(%) |
| <b>Mean</b>  | 50.7                       | 60.9                       | 12.2              | 73.1            | 50.8                       | 23.0                       | 6.9               | 80.6            |
| <b>SD</b>    | 9.8                        | 10.9                       | 3.8               | 9.6             | 9.8                        | 7.2                        | 2.4               | 8.4             |
| <b>Min</b>   | 25.1                       | 28.2                       | 1.9               | 42.7            | 24.9                       | 6.4                        | 0.9               | 49.2            |
| <b>2.5%</b>  | 33.2                       | 40.4                       | 5.5               | 54.6            | 33.1                       | 11.2                       | 2.9               | 63.5            |
| <b>97.5%</b> | 71.1                       | 82.1                       | 20.1              | 91.2            | 71.0                       | 39.0                       | 12.2              | 94.7            |

## References

1. Inoue, S., Sawayama, S., Dote, Y. & Ogi, T. Behaviour of nitrogen during liquefaction of dewatered sewage sludge. *Biomass and Bioenergy* **12**, 473–475 (1997).
2. Anastasakis, K., Biller, P., Madsen, R. B., Glasius, M. & Johannsen, I. Continuous Hydrothermal Liquefaction of Biomass in a Novel Pilot Plant with Heat Recovery and Hydraulic Oscillation. *Energies* **11**, 1–24 (2018).
3. Silva Thomsen, L. B. *et al.* Hydrothermal liquefaction of sewage sludge; energy considerations and fate of micropollutants during pilot scale processing. *Water Res.* **183**, 116101 (2020).
4. Marrone, P. A. *et al.* Bench-Scale Evaluation of Hydrothermal Processing Technology for Conversion of Wastewater Solids to Fuels. *Water Environ. Res.* **90**, 329–342 (2018).
5. Prestigiacomio, C. *et al.* Catalytic hydrothermal liquefaction of municipal sludge assisted by formic acid for the production of next-generation fuels. *Energy* **232**, 121086 (2021).
6. Malins, K. *et al.* Bio-oil from thermo-chemical hydro-liquefaction of wet sewage sludge. *Bioresour. Technol.* **187**, 23–29 (2015).
7. Huang, H. jun *et al.* Comparative studies of thermochemical liquefaction characteristics of microalgae, lignocellulosic biomass and sewage sludge. *Energy* **56**, 52–60 (2013).
8. Conti, F. *et al.* Valorization of animal and human wastes through hydrothermal liquefaction for biocrude production and simultaneous recovery of nutrients. *Energy Convers. Manag.* **216**, 112925 (2020).
9. Qian, L., Wang, S. & Savage, P. E. Hydrothermal liquefaction of sewage sludge under isothermal and fast conditions. *Bioresour. Technol.* **232**, 27–34 (2017).
10. Zhang, W. & Liang, Y. Hydrothermal liquefaction of sewage sludge – effect of four reagents on relevant parameters related to biocrude and PFAS. *J. Environ. Chem. Eng.* **10**, 107092 (2022).
11. Xu, D. *et al.* Comprehensive evaluation on product characteristics of fast hydrothermal liquefaction of sewage sludge at different temperatures. *Energy* **159**, 686–695 (2018).
12. Shah, A. A., Toor, S. S., Conti, F., Nielsen, A. H. & Rosendahl, L. A. Hydrothermal liquefaction of high ash containing sewage sludge at sub and supercritical conditions. *Biomass and Bioenergy* **135**, (2020).
13. Vardon, D. R. *et al.* Chemical properties of biocrude oil from the hydrothermal liquefaction of Spirulina algae, swine manure, and digested anaerobic sludge. *Bioresour. Technol.* **102**, 8295–8303 (2011).
14. Astals, S. *et al.* Anaerobic digestion of seven different sewage sludges: A biodegradability and modelling study. *Water Res.* **47**, 6033–6043 (2013).
15. Seiple, T. E., Skaggs, R. L., Fillmore, L. & Coleman, A. M. Municipal wastewater sludge as a renewable, cost-effective feedstock for transportation biofuels using hydrothermal liquefaction. *J. Environ. Manage.* **270**, 110852 (2020).
16. Posmanik, R. *et al.* Coupling hydrothermal liquefaction and anaerobic digestion for energy valorization from model biomass feedstocks. *Bioresour. Technol.* **233**, 134–143 (2017).
